# Supplementary material
Source: PubMed Central journal article supplement (PMC1838614)
Supplement: pnas_0610615104_4.pdf [file pnas_0610615104_4.pdf]

**Table 1****Genes enriched > 5-fold in brown versus white undifferentiated preadipocytes****(FDR<1%)**

| <b>Gene Symbol</b> | <b>Gene Title</b>                                             |
|--------------------|---------------------------------------------------------------|
| <i>Acta1</i>       | actin, alpha 1, skeletal muscle                               |
| <i>Actc1</i>       | actin, alpha, cardiac                                         |
| <i>Cd83</i>        | CD83 antigen                                                  |
| <i>Chrna1</i>      | cholinergic receptor, nicotinic, alpha polypeptide 1 (muscle) |
| <i>Cldn5</i>       | claudin 5                                                     |
| <i>Icam2</i>       | intercellular adhesion molecule 2                             |
| <i>Lhx8</i>        | LIM homeobox protein 8                                        |
| <i>Meox2</i>       | mesenchyme homeobox 2                                         |
| <i>Mme</i>         | membrane metallo endopeptidase                                |
| <i>Myh3</i>        | myosin, heavy polypeptide 3, skeletal muscle, embryonic       |
| <i>Myl1</i>        | myosin, light polypeptide 1                                   |
| <i>Mylpf</i>       | myosin light chain, phosphorylatable, fast skeletal muscle    |
| <i>Myog</i>        | myogenin                                                      |
| <i>Tbx15</i>       | T-box 15                                                      |
| <i>Tnnc1</i>       | troponin C, cardiac/slow skeletal                             |
| <i>Tnni1</i>       | troponin I, skeletal, slow 1                                  |
| <i>Tnnt3</i>       | troponin T3, skeletal, fast                                   |
| <i>Zic1</i>        | zinc finger protein of the cerebellum 1                       |
